# Supplementary material for: Multi-response upconverted ultraviolet-C photons for tagging and sterilization
Source: Royal Society of Chemistry journal article supplement (doi:10.1039/d3tc01168b), 2023-01-01
Supplement: d3tc01168b1.pdf [file d3tc01168b1.pdf]

# **Multi-Response Upconverted Ultraviolet-C Photons for Tagging and Sterilization**

Chunzheng Wang,<sup>1</sup> Leipeng Li,<sup>1,3\*</sup> Pinshu Lv,<sup>1</sup> Lingzhu Zi,<sup>1</sup> Shiji Feng,<sup>1</sup> Furong Yang,<sup>1</sup>

Jianrong Qiu,<sup>2</sup> and Yanmin Yang<sup>1,4\*</sup>

<sup>1</sup>*College of Physics Science and Technology, Hebei University, Baoding 071002, China*

<sup>2</sup>*State Key Laboratory of Modern Optical Instrumentation, College of Optical Science and Engineering,*

*Zhejiang University, Hangzhou 310058, China*

<sup>3</sup>*e-mail: [lpl@hbu.edu.cn](mailto:lpl@hbu.edu.cn)*

<sup>4</sup>*e-mail: [yangyanmin@hbu.edu.cn](mailto:yangyanmin@hbu.edu.cn)*

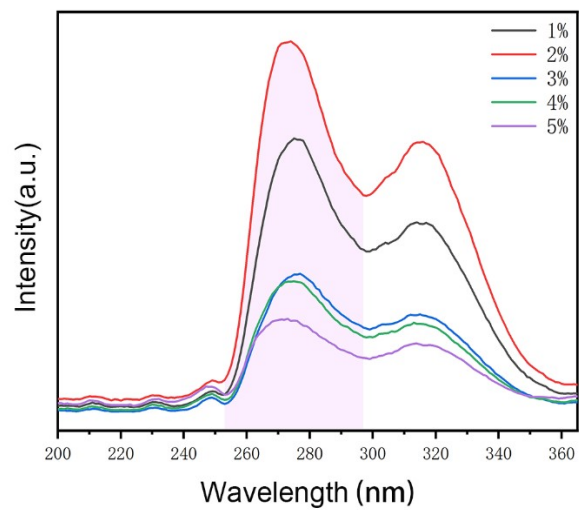

**Figure S1.** PL spectra of SrSiO<sub>3</sub>:xPr<sup>3+</sup> ( $x = 0.01, 0.02, 0.03, 0.04, \text{ and } 0.05$ ) under excitation of a 450 nm laser.

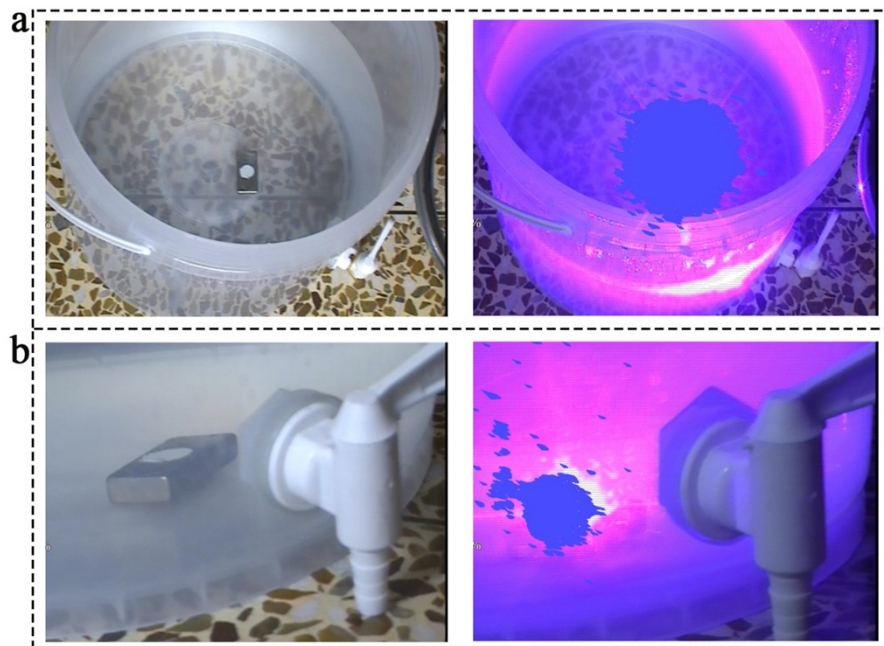

**Figure S2.** Demonstration of tagging via SrSiO<sub>3</sub>:0.02Pr<sup>3+</sup> in a bucket by using a 450 nm LD as excitation source. (a) Top view, and (b) Side view. Left panel: under natural light, and right panel: under excitation of a 450 nm LD.

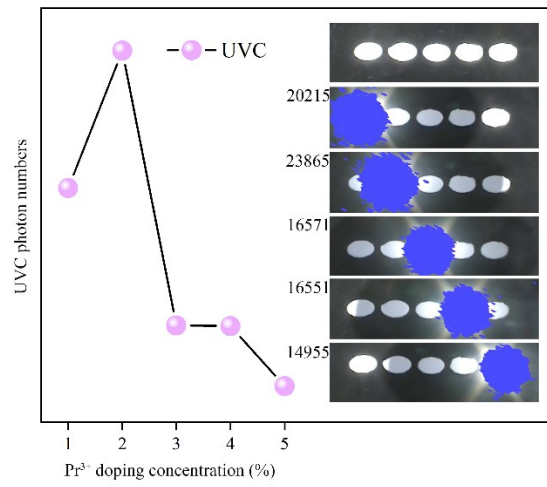

**Figure S3.** Number of the UVC photons of SrSiO<sub>3</sub>:xPr<sup>3+</sup> ( $x = 0.01, 0.02, 0.03, 0.04,$  and  $0.05$ ) under excitation of sunlight.
